# Supplementary material for: Chemically anchored two-dimensional-SiOx/zero-dimensional-MoO2 nanocomposites for high-capacity lithium storage materials
Source: Royal Society of Chemistry journal article supplement (doi:10.1039/d0ra02462g), 2020-01-01
Supplement: d0ra02462g1.pdf [file d0ra02462g1.pdf]

†*Electronic Supplementary Information (ESI)*

Chemically Anchored Two-Dimensional–SiO<sub>x</sub>/Zero-  
Dimensional–MoO<sub>2</sub> nanocomposites for High-Capacity  
Lithium Storage Materials

Soohwan Kim, Hyundong Yoo, and Hansu Kim\*

Department of Energy Engineering, Hanyang University, 222 Wangsimni-ro, Seongdong-gu,  
Seoul, 04763, Republic of Korea

**Corresponding Author**

E-mail: [khansu@hanyang.ac.kr](mailto:khansu@hanyang.ac.kr). (H. Kim)

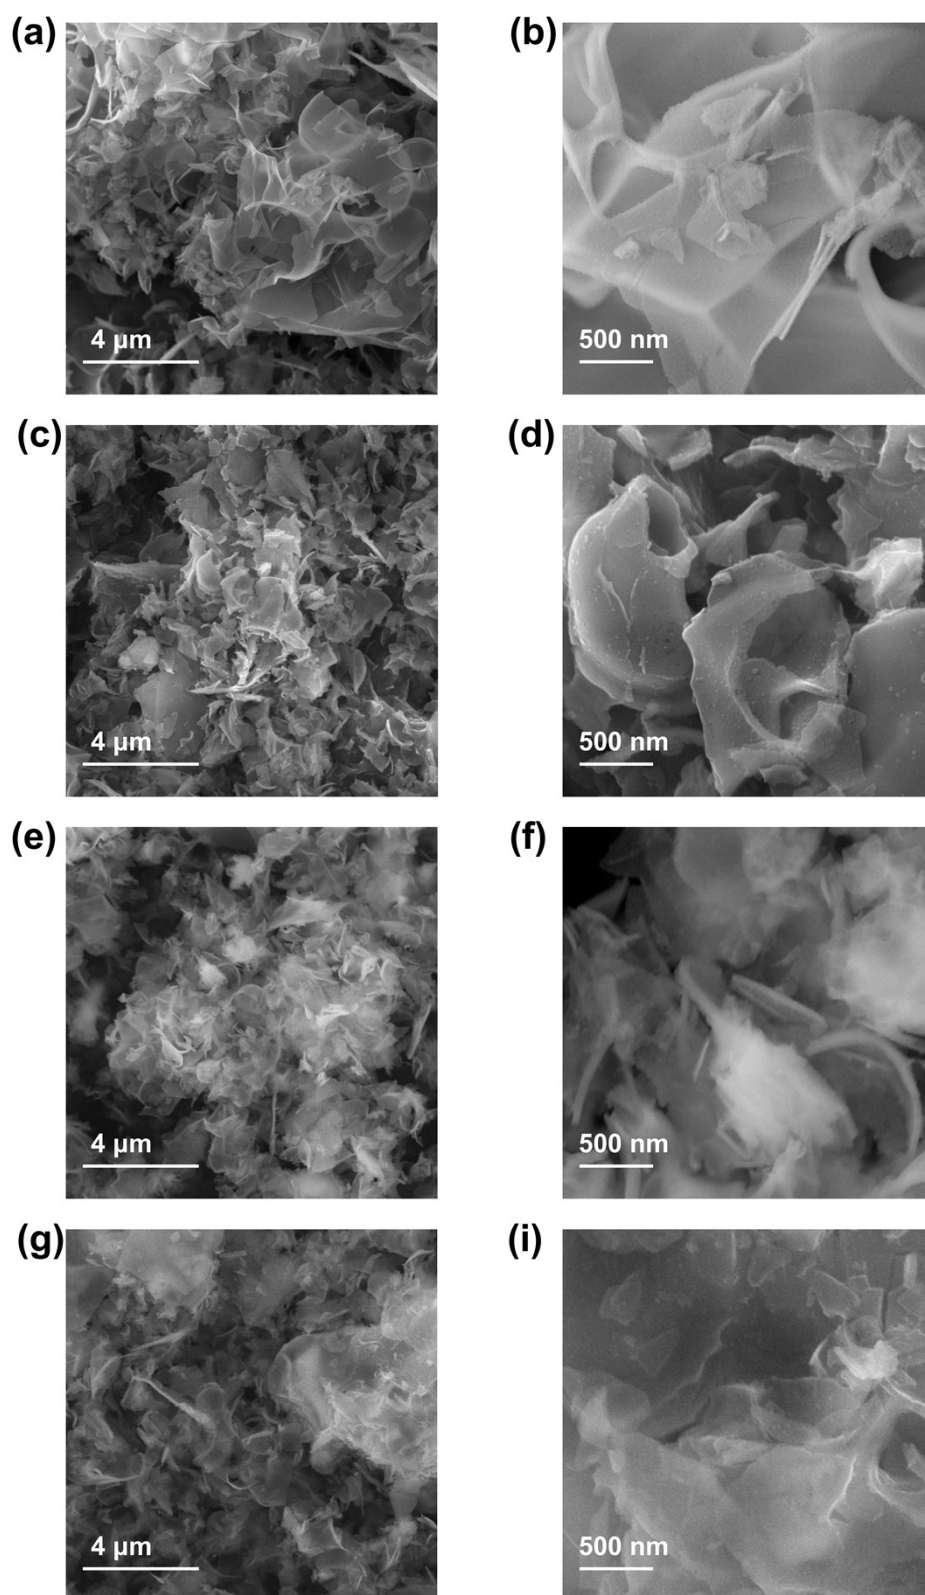

**Fig. S1** FESEM images of the 2D-SiO<sub>x</sub> nanosheets and 2D-SiO<sub>x</sub>/0D-MoO<sub>2</sub> nanocomposites; (a, b) bare 2D-SiO<sub>x</sub> nanosheets, (c, d) 20 wt%, (e, f) 30 wt%, and (g, h) 40 wt% of MoO<sub>2</sub> contained 2D-SiO<sub>x</sub>/0D-MoO<sub>2</sub> nanocomposites.

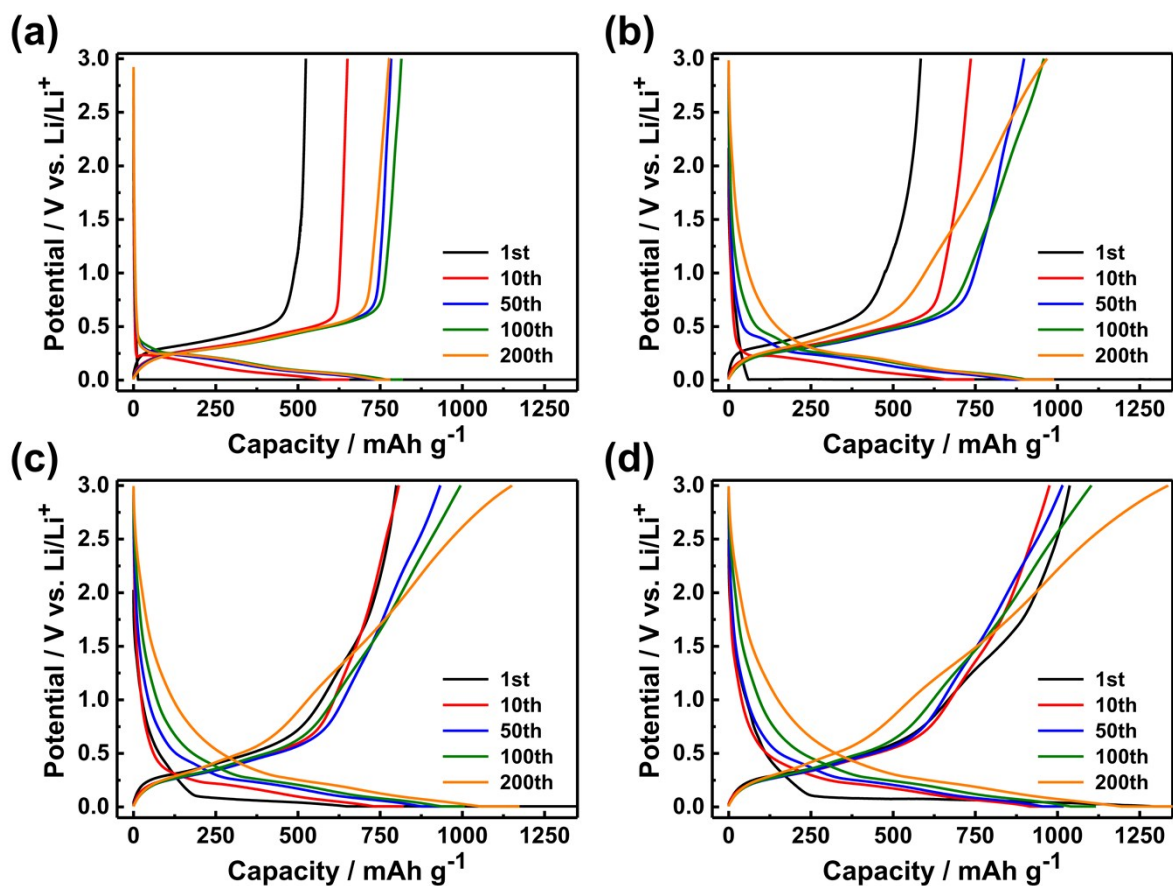

**Fig. S2** Galvanostatic charge-discharge curves for selected cycles in the voltage range of 0.005-3.0 V versus Li/Li<sup>+</sup> at a constant current density of 0.2 C (200 mA g<sup>-1</sup>); (a) bare 2D-SiO<sub>x</sub> nanosheets, (b) 20 wt%, (c) 30 wt%, and (d) 40 wt% of MoO<sub>2</sub> contained 2D-SiO<sub>x</sub>/0D-MoO<sub>2</sub> nanocomposites.
